# Supplementary material
Source: Research Square preprint supplement (doi:10.21203/rs.3.rs-9925684/v1)
Supplement: Supplementary file [file aac96bb75dfece3869afd631.pdf]

**Supplementary Table - 1** : List of peptides from LmrP datasets wild-type (n=3) and mutant D68N (n=1) classified as transmembranous, including TMH number, peptide sequence, start and end positions, and R.F.U. value at 15 min. The last column, “Dynamics”, classifies a peptide as flexible when its R.F.U. is above the mean R.F.U. of the extramembranous peptides dataset for at least three biological replicates.

| TMH | Sequence         | Start | End | LmrP WT                                             | LmrP WT                                             | LmrP WT                                             | LmrP D68N                                | Dynamics |
|-----|------------------|-------|-----|-----------------------------------------------------|-----------------------------------------------------|-----------------------------------------------------|------------------------------------------|----------|
|     |                  |       |     | R.F.U. (15 min - %) Replicat 1 (Threshold : 29.69%) | R.F.U. (15 min - %) Replicat 2 (Threshold : 31.96%) | R.F.U. (15 min - %) Replicat 3 (Threshold : 20.07%) | R.F.U. (15 min - %) (Threshold : 29.29%) |          |
| 1   | LRLGIVF          | 14    | 20  | /                                                   | 21.95%                                              | 6.30%                                               | /                                        |          |
|     | LRLGIVFL         | 14    | 21  | 8.27%                                               | 18.61%                                              | 4.20%                                               | 8.61%                                    |          |
|     | GIVFLGA          | 17    | 23  | 2.48%                                               | 2.58%                                               | 1.97%                                               | 4.9%                                     |          |
|     | GIVFLGAF         | 17    | 24  | 1.39%                                               | /                                                   | 2.03%                                               | 2.03%                                    |          |
|     | GIVFLGAFSYGTVFSS | 17    | 32  | /                                                   | 32.94%                                              | 18.85%                                              | /                                        |          |
|     | GAFSYGTVF        | 22    | 30  | 5.43%                                               | 8.14%                                               | 2.53%                                               | 2.69%                                    |          |
|     | FSYGTVF          | 24    | 30  | 8.97%                                               | 10.59%                                              | 3.50%                                               | 5.13%                                    |          |
| 2   | GILLALSA         | 47    | 54  | 7.99%                                               | /                                                   | /                                                   | 7.26%                                    |          |
|     | VFGTHIQL         | 78    | 85  | 0.69%                                               | 2.69%                                               | 0.00%                                               | 1.08%                                    |          |
| 3   | FGTHIQL          | 79    | 85  | 0.06%                                               | /                                                   | /                                                   | 0.77%                                    |          |
|     | GTHIQLL          | 80    | 86  | 1.15%                                               | /                                                   | /                                                   | 0.49%                                    |          |
|     | IQLLGAAL         | 83    | 90  | -0.05%                                              | 1.15%                                               | /                                                   | 0.16%                                    |          |
|     | LGAALAI          | 86    | 92  | 0.23%                                               | /                                                   | 0.65%                                               | 0.36%                                    |          |
| 4   | LISFGYN          | 111   | 117 | 0.15%                                               | /                                                   | /                                                   | 0.68%                                    |          |
|     | ISFGYNF          | 112   | 118 | 0.01%                                               | /                                                   | /                                                   | 2.21%                                    |          |
|     | FVITAGNA         | 118   | 125 | 7.19%                                               | /                                                   | 3.92%                                               | 15.73%                                   |          |
|     | FVITAGNAM        | 118   | 126 | 10.87%                                              | 20.41%                                              | 7.91%                                               | 18.76%                                   |          |
|     | VITAGNAM         | 119   | 126 | 14.56%                                              | 26.64%                                              | 10.91%                                              | 23.78%                                   |          |
| 5   | SVILGAAL         | 150   | 157 | 0.82%                                               | 3.90%                                               | 0.57%                                               | 1.42%                                    |          |
|     | GAALGAW          | 154   | 160 | 8.56%                                               | /                                                   | /                                                   | 2.10%                                    |          |
|     | MIFMGAN *        | 219   | 225 | 36.22%                                              | 41.86%                                              | 28.19%                                              | 38.25%                                   | Flexible |
| 7   | IFMGAN           | 220   | 225 | /                                                   | 33.56%                                              | 24.95%                                              | /                                        |          |
|     | MGANIATT         | 222   | 229 | /                                                   | /                                                   | 36.04%                                              | /                                        |          |
|     | IIMQFDNF *       | 231   | 238 | 36.23%                                              | 35.33%                                              | 25.50%                                              | 29.54%                                   | Flexible |
| 8   | MAIGMIF          | 301   | 307 | 11.44%                                              | /                                                   | /                                                   | /                                        |          |
|     | IAGIVY           | 319   | 324 | /                                                   | 52.42%                                              | /                                                   | /                                        |          |
| 10  | IAGIVYTLGE *     | 319   | 328 | 37.91%                                              | 52.59%                                              | 27.15%                                              | /                                        | Flexible |
|     | IVYTLGE *        | 322   | 328 | 31.15%                                              | 40.69%                                              | 25.66%                                              | 36.48%                                   | Flexible |
|     | IVYTLGEI *       | 322   | 329 | 32.45%                                              | 46.88%                                              | /                                                   | 33.76%                                   | Flexible |
|     | IVYTPSVQ *       | 329   | 336 | 35.64%                                              | 42.20%                                              | 29.75%                                              | 35.86%                                   | Flexible |
|     | IVYTPSVQTL       | 329   | 338 | 42.38%                                              | /                                                   | 28.09%                                              | 41.96%                                   | Flexible |
|     | IVYTPSVQTLGA     | 329   | 340 | 40.74%                                              | /                                                   | 28.45%                                              | 40.18%                                   | Flexible |
|     | IVYTPSVQTLGAD    | 329   | 341 | 36.68%                                              | /                                                   | 27.71%                                              | 35.98%                                   | Flexible |
| 11  | AIKMPIASIL *     | 356   | 365 | 32.11%                                              | 38.91%                                              | 18.53%                                              | 32.41%                                   | Flexible |
|     | IKMPIASIL        | 357   | 365 | 7.58%                                               | 36.88%                                              | /                                                   | /                                        |          |
|     | MPIASIL          | 359   | 365 | 23.84%                                              | /                                                   | 16.98%                                              | 22.49%                                   |          |
|     | ASILAGL          | 362   | 368 | -0.93%                                              | 3.26%                                               | /                                                   | 0.79%                                    |          |
| 12  | ALTEVLA          | 386   | 392 | 9.29%                                               | 29.14%                                              | 1.37%                                               | 10.97%                                   |          |

**Supplementary Table - 2** : List of peptides from NorA WT datasets (n = 3) classified as extramembranous, including TMH number, peptide sequence, start and end positions, and R.F.U. value at 15 min. The last column, “Dynamics”, classifies a peptide as flexible when its R.F.U. is above the mean R.F.U. of the extramembranous peptides dataset for three biological replicates..

| TMH      | Sequence             | Start | End    | R.F.U. (15 min - %)                | R.F.U. (15 min - %)                | R.F.U. (15 min - %)                | Dynamics |
|----------|----------------------|-------|--------|------------------------------------|------------------------------------|------------------------------------|----------|
|          |                      |       |        | Replicat 1<br>(Threshold : 34.67%) | Replicat 2<br>(Threshold : 34.64%) | Replicat 3<br>(Threshold : 28.76%) |          |
| 1        | FLGIGL               | 16    | 21     | /                                  | 6.15%                              | /                                  |          |
|          | LVIPVL               | 21    | 26     | /                                  | /                                  | 14.58%                             |          |
|          | LLVAAF               | 42    | 47     | /                                  | 2.07%                              | /                                  |          |
| 2        | FALSQM               | 47    | 52     | 17.26%                             | 17.76%                             | /                                  |          |
|          | FALSQMIISPF          | 47    | 59     | 39.58%                             | /                                  | /                                  |          |
|          | ALSQMIISPF           | 48    | 57     | 50.03%                             | /                                  | /                                  |          |
| 3        | IISPFGGTL            | 53    | 61     | 37.69%                             | 31.59%                             | 17.35%                             |          |
|          | IGLIL                | 73    | 77     | 2.78%                              | /                                  | /                                  |          |
|          | FSVSE                | 78    | 82     | 16.39%                             | /                                  | /                                  |          |
| 4        | FSVSEFM              | 78    | 84     | /                                  | 19.76%                             | 13.25%                             |          |
|          | MLSRVIGGM            | 95    | 103    | 35.27%                             | /                                  | /                                  |          |
|          | MLSRVIGGMSA          | 95    | 105    | 37.04%                             | /                                  | /                                  |          |
|          | MLSRVIGGMSAG         | 95    | 106    | 42.38%                             | 37.45%                             | 22.04%                             |          |
|          | LSRVIGGMSAG          | 96    | 106    | 47.46%                             | 45.17%                             | 26.91%                             |          |
|          | LSRVIGGMSAGMVMPGVTGL | 96    | 115    | /                                  | /                                  | 26.78%                             |          |
|          | SRVIGGMSAG           | 97    | 106    | 47.87%                             | 44.45%                             | 28.18%                             | Flexible |
|          | SRVIGGMSAGMVMPGVTGL  | 97    | 115    | /                                  | 46.98%                             | 28.09%                             |          |
|          | GMVMPGVTGL           | 106   | 115    | 51.02%                             | 48.57%                             | 40.04%                             | Flexible |
|          | MVMPGVTGL            | 107   | 115    | 42.91%                             | 45.33%                             | 37.04%                             | Flexible |
| 5        | VMPGVTGL             | 108   | 115    | 48.24%                             | /                                  | 40.91%                             |          |
|          | MPGVTGL              | 109   | 115    | /                                  | /                                  | 40.95%                             |          |
|          | PGVTGL               | 110   | 115    | 61.96%                             | 58.14%                             | 47.89%                             | Flexible |
|          | FGYMSA               | 129   | 134    | 42.37%                             | 49.74%                             | 42.86%                             | Flexible |
|          | GYMSA                | 130   | 134    | 36.89%                             | /                                  | /                                  |          |
|          | IINSGF               | 135   | 140    | 36.73%                             | 32.47%                             | 18.59%                             |          |
|          | IINSGFILGPGIGGF      | 135   | 149    | /                                  | 39.85%                             | 20.80%                             |          |
|          | FILGPGIGGF           | 140   | 149    | /                                  | 43.93%                             | 17.77%                             |          |
|          | ILGPGIGGF            | 141   | 149    | 43.51%                             | 40.53%                             | 28.13%                             | Flexible |
|          | GPGIGGF              | 143   | 149    | /                                  | 40.74%                             | /                                  |          |
| 6        | FAGAL                | 161   | 165    | 23.64%                             | /                                  | /                                  |          |
|          | FAGALGIL             | 161   | 168    | /                                  | 18.88%                             | 18.26%                             |          |
|          | FAGALGILA            | 161   | 169    | /                                  | /                                  | 17.66%                             |          |
|          | GILAF                | 166   | 170    | 6.83%                              | /                                  | /                                  |          |
|          | AFIMS                | 169   | 173    | 7.24%                              | /                                  | /                                  |          |
| 7        | FITPVIL              | 204   | 210    | /                                  | 27.57%                             | 26.25%                             |          |
|          | ITPVIL               | 205   | 210    | 15.29%                             | 17.19%                             | /                                  |          |
|          | LTLVLSFG             | 210   | 217    | /                                  | /                                  | 18.46%                             |          |
|          | TLVLSF               | 211   | 216    | 11.69%                             | 6.96%                              | /                                  |          |
|          | LVLSF                | 212   | 216    | 4.74%                              | /                                  | /                                  |          |
|          | LVLSFGLSA            | 212   | 220    | /                                  | /                                  | 22.19%                             |          |
|          | VLSFGLSA             | 213   | 220    | /                                  | /                                  | 23.66%                             |          |
|          | LSFGLSAF             | 214   | 221    | 46.19%                             | /                                  | /                                  |          |
| 8        | SFGLSA               | 215   | 220    | 24.71%                             | /                                  | /                                  |          |
|          | SFGLSAF              | 215   | 221    | /                                  | 30.23%                             | /                                  |          |
|          | IAITGGGIF            | 242   | 250    | 43.79%                             | 32.80%                             | 16.87%                             |          |
|          | ITGGGIF              | 244   | 250    | 34.15%                             | /                                  | /                                  |          |
|          | GIFGALF              | 248   | 254    | /                                  | 3.49%                              | /                                  |          |
| 9        | GIFGALFQ             | 248   | 255    | 40.18%                             | /                                  | /                                  |          |
|          | GIFGALFQ             | 248   | 255    | 40.18%                             | /                                  | /                                  |          |
|          | LTFIAWSSLYS          | 269   | 279    | 39.05%                             | /                                  | /                                  |          |
| 10       | IAWSLL               | 272   | 277    | /                                  | 18.00%                             | /                                  |          |
|          | DMIRPAITNY           | 307   | 316    | /                                  | /                                  | 35.23%                             |          |
| 11       | NSTFTSMGN            | 332   | 340    | 32.14%                             | /                                  | /                                  |          |
|          | TSMGNF               | 336   | 341    | 39.66%                             | 34.68%                             | 23.59%                             |          |
|          | TSMGNFIGPLIA         | 336   | 347    | /                                  | 36.20%                             | 24.50%                             |          |
|          | TSMGNFIGPLIAGAL      | 336   | 350    | /                                  | 45.01%                             | 27.75%                             |          |
|          | IGPLIA               | 342   | 347    | 41.48%                             | 42.37%                             | 32.86%                             | Flexible |
| 12       | IGPLIAGAL            | 342   | 350    | /                                  | 46.76%                             | 34.02%                             |          |
|          | MAIGVS               | 361   | 366    | 21.72%                             | /                                  | /                                  |          |
|          | MAIGVSL              | 361   | 367    | 21.56%                             | 36.39%                             | 46.73%                             |          |
|          | AIGVSL               | 362   | 367    | 18.76%                             | 32.67%                             | 47.30%                             |          |
|          | VSLAGVV              | 365   | 371    | 15.69%                             | 25.67%                             | 33.49%                             |          |
|          | AGVVIVL              | 368   | 374    | 1.77%                              | /                                  | 18.04%                             |          |
|          | VVIVL                | 370   | 374    | 6.43%                              | /                                  | /                                  |          |
| EKQHRACL | 376                  | 383   | 21.84% | /                                  | /                                  |                                    |          |

**Suppl. Table - 3** : List of peptides from QacA WT datasets (n = 3) classified as extramembranous, including TMH number, peptide sequence, start and end positions, and R.F.U. value at 15 min. The last column, “Dynamics”, classifies a peptide as flexible when its R.F.U. is above the mean R.F.U. of the extramembranous peptides dataset for three biological replicates.

| TMH     | Sequence     | Start | End    | R.F.U. (15 min - %)                | R.F.U. (15 min - %)                | R.F.U. (15 min - %)                | Dynamics |
|---------|--------------|-------|--------|------------------------------------|------------------------------------|------------------------------------|----------|
|         |              |       |        | Replicat 1<br>(Threshold : 21.98%) | Replicat 2<br>(Threshold : 34.41%) | Replicat 3<br>(Threshold : 26.42%) |          |
| 1       | FVVTMD       | 29    | 34     | /                                  | 13.85%                             | /                                  |          |
|         | FVVTMDM      | 29    | 35     | 17.82%                             | /                                  | /                                  |          |
|         | VVTMDM       | 30    | 35     | /                                  | 29.33%                             | /                                  |          |
| 2       | IMALPEL      | 39    | 45     | 14.73%                             | 28.65%                             | /                                  |          |
|         | WIVDIYS      | 58    | 64     | /                                  | 60.60%                             | 54.93%                             |          |
|         | IVDIYS       | 59    | 64     | /                                  | 49.61%                             | /                                  |          |
|         | AGFIPLSA     | 68    | 76     | 8.72%                              | 15.13%                             | /                                  |          |
|         | FIPLSA       | 70    | 76     | 19.06%                             | 17.48%                             | 50.89%                             |          |
| 3       | IPLSA        | 71    | 76     | /                                  | 16.30%                             | /                                  |          |
|         | LTGFALFG     | 88    | 95     | 22.00%                             | /                                  | /                                  |          |
|         | FGLVSL       | 94    | 99     | 5.34%                              | 1.79%                              | /                                  |          |
| 4       | IRFLGIAGA    | 113   | 122    | /                                  | 12.77%                             | /                                  |          |
|         | LIMPTT       | 123   | 128    | /                                  | 18.06%                             | /                                  |          |
|         | LIMPTTL      | 123   | 129    | 14.22%                             | 18.71%                             | /                                  |          |
|         | LIMPTTLSM    | 123   | 131    | /                                  | 22.23%                             | 21.52%                             |          |
| 5       | PTTLSM       | 126   | 131    | /                                  | 0.75%                              | /                                  |          |
|         | AVWSIA       | 147   | 152    | /                                  | 20.52%                             | /                                  |          |
|         | AVWSIASS     | 147   | 154    | /                                  | /                                  | 23.81%                             |          |
|         | AVWSIASSIG   | 147   | 156    | /                                  | 27.41%                             | /                                  |          |
|         | WSIASSIG     | 149   | 156    | /                                  | 27.01%                             | 21.35%                             |          |
|         | GAVFGPIGGAL  | 156   | 167    | 7.24%                              | /                                  | /                                  |          |
|         | GAVFGPIGGALL | 156   | 168    | 7.57%                              | /                                  | /                                  |          |
|         | AVFGPIGGAL   | 157   | 167    | 4.02%                              | 22.82%                             | /                                  |          |
|         | VFGPIGGALL   | 158   | 168    | 0.51%                              | /                                  | /                                  |          |
|         | PIGGAL       | 161   | 167    | /                                  | 16.38%                             | /                                  |          |
| 6       | LINV PFA     | 178   | 184    | /                                  | /                                  | 17.95%                             |          |
|         | LINV PFAIIA  | 178   | 187    | 5.00%                              | 12.35%                             | /                                  |          |
|         | INV PFAII    | 179   | 186    | /                                  | /                                  | 12.90%                             |          |
|         | AVVAGL       | 187   | 192    | 6.00%                              | 4.50%                              | /                                  |          |
|         | AVVAGLF      | 187   | 193    | 1.08%                              | /                                  | /                                  |          |
| 7       | VVAGLFL      | 188   | 194    | 23.67%                             | /                                  | /                                  |          |
|         | SIAGMIG      | 216   | 222    | 9.83%                              | /                                  | 6.38%                              |          |
|         | EFSKEGL      | 229   | 235    | 53.25%                             | /                                  | /                                  |          |
| 9       | FSAGTIAA     | 276   | 283    | 26.75%                             | /                                  | /                                  |          |
|         | FAMASVL      | 288   | 294    | 7.12%                              | 9.04%                              | 13.00%                             |          |
|         | FAMASVLL     | 288   | 295    | 6.84%                              | /                                  | /                                  |          |
|         | LLASQWL      | 295   | 301    | /                                  | /                                  | 23.19%                             |          |
|         | LASQWL       | 296   | 301    | 11.22%                             | /                                  | /                                  |          |
|         | ASQWLQV      | 297   | 303    | 29.45%                             | /                                  | /                                  |          |
|         | LYLLPMA      | 314   | 320    | 67.22%                             | /                                  | /                                  |          |
| 10      | YLLPMAIG     | 315   | 322    | /                                  | /                                  | 27.39%                             |          |
|         | YLLPMAIGD    | 315   | 323    | 20.72%                             | /                                  | 20.44%                             |          |
|         | YLLPMAIGDMVF | 315   | 326    | /                                  | /                                  | /                                  |          |
|         | IGDMVF       | 321   | 326    | 31.95%                             | /                                  | /                                  |          |
|         | IGDMVFAP     | 321   | 328    | 40.31%                             | /                                  | /                                  |          |
|         | MVFAPIAPGL   | 324   | 333    | /                                  | /                                  | 30.89%                             |          |
|         | VFAPAPIAPGL  | 325   | 333    | 20.86%                             | 29.33%                             | 32.57%                             | Flexible |
|         | VFAPAPIAPGLA | 325   | 334    | /                                  | /                                  | 32.12%                             |          |
|         | APIAPG       | 327   | 332    | 67.61%                             | /                                  | /                                  |          |
|         | APIAPGL      | 327   | 333    | 29.80%                             | 37.44%                             | 36.69%                             | Flexible |
| 11      | APIAPGLA     | 327   | 334    | 37.33%                             | 36.52%                             | 39.49%                             | Flexible |
|         | PSGIGIAA     | 344   | 351    | 4.47%                              | 20.28%                             | /                                  |          |
|         | AAIGMF       | 350   | 355    | 28.28%                             | /                                  | /                                  |          |
| 12      | ILVGAGM      | 374   | 380    | /                                  | /                                  | 5.13%                              |          |
|         | ILVGAGMASL   | 374   | 383    | 8.97%                              | 7.67%                              | /                                  |          |
|         | VGAGMASL     | 376   | 383    | /                                  | /                                  | 28.18%                             |          |
|         | AVASAL       | 384   | 389    | 14.97%                             | 11.49%                             | /                                  |          |
|         | AVASALIM     | 384   | 391    | /                                  | /                                  | 15.67%                             |          |
| 13      | PTSKAGNAAA   | 395   | 404    | /                                  | 39.10%                             | /                                  |          |
|         | YDLGNVF      | 410   | 416    | /                                  | 17.17%                             | 14.27%                             |          |
|         | YDLGNVFG     | 410   | 417    | 5.41%                              | 23.00%                             | 16.74%                             |          |
|         | YDLGNVFGVAVL | 410   | 421    | 6.66%                              | 18.90%                             | 15.70%                             |          |
|         | GSLSSM       | 422   | 427    | /                                  | 24.43%                             | /                                  |          |
|         | GSLSSML      | 422   | 428    | 15.25%                             | 19.61%                             | /                                  |          |
| 14      | AVTSFNDA     | 474   | 481    | 12.97%                             | /                                  | /                                  |          |
|         | AVTSFNDAF    | 474   | 482    | /                                  | /                                  | 31.97%                             |          |
|         | FNDAFVA      | 478   | 484    | 38.80%                             | /                                  | /                                  |          |
|         | FVATAL       | 482   | 487    | /                                  | 11.80%                             | /                                  |          |
|         | VATALV       | 483   | 488    | 38.80%                             | /                                  | /                                  |          |
|         | TALVGGIIM    | 485   | 493    | 1.52%                              | /                                  | /                                  |          |
|         | ALVGGIIMII   | 486   | 495    | /                                  | 10.10%                             | /                                  |          |
|         | VGGIIM       | 488   | 493    | 1.15%                              | 1.88%                              | /                                  |          |
|         | GGIIMI       | 489   | 494    | 42.94%                             | /                                  | /                                  |          |
| GGIIMII | 489          | 495   | 50.15% | /                                  | /                                  |                                    |          |
